# Supplementary material
Source: Research Square preprint supplement (doi:10.21203/rs.3.rs-8997024/v1)
Supplement: Supplementary file 1 [file 4ef4c2fef6c9631e596b5c6a.docx]

**Supplementary File 2**

**Details in Assessment Tools**

1. **PEMAT** (Patient education materials assessment tool)

PEMAT is the most comprehensive tool among the tools in our study, as it consists of 25 questions, with 21 representing the understandability of health information and 4 evaluating the actionability of recommendations by videos. See Supplementary File 3 for detailed scoring criteria.

PEMAT can not shown in a Word file, see more details in Supplementary File 3 (Excel) or visit <http://www.ahrq.gov/pemat>

1. **VIQI**  (Video Information and Quality Index)

The score of each question ranges from 1 to 5. The total score is 5 to 20.

【VIQI 1】 information flow

The VIQI 1 in our study is according to thumbs-up because the data of thumbs-up are available from all three platforms.

1 ＜10 thumbs-up

2 ＜100 thumbs-up

3 ＜1000 thumbs-up

4 ＜10000 thumbs-up

5 ≥10000 thumbs-up

If a video turns off the bottom of thumbs-up (very few would do this), we rate its flow by views.

1 ＜100 views

2 ＜1000 views

3 ＜10000 views

4 ＜100000 views

5 ≥100000 views

【VIQI 2】 information accuracy

【VIQI 3】quality (videos including one point for each image, animation, interview, video captions, and summary)

【VIQI 4】 precision (level of coherence between video title and content)

1. **mDISCERN** (Modified DISCERN)

The mDISCERN was adapted from the DISCERN tool and is more suitable for assessing video material, consist of five parts including clear aims, reliability, balance, additional reference and areas of uncertainty. The score of each question ranges from 0 to 1. The total score is 0 to 5.

1. mDISCERN-1 Are the aims clear and achieved?

0-no 1-yes

(2) mDISCERN-2 Are reliable sources of information used?

0-no 1-yes

(3) mDISCERN-3 Is the information presented balanced and unbiased?

0-no 1-yes

(4) mDISCERN-4 Are additional sources of information listed for patient reference?

0-no 1-yes

(5) mDISCERN-5 Are areas of uncertainty mentioned?

1. no 1-yes
2. **GQS (**Global Quality Score)

GQS, a 5-point scale, assesses the overall video quality, ranging from poor (1) to excellent (5). It is the simplest of all tools in our study.

(Score 1) Poor quality, poor flow of the site, most information missing, not at all useful for patients.

(Score 2) Generally poor quality and poor flow, some information listed but many important topics missing.of very limited use to patients.

(Score 3) Moderate quality, suboptimal flow, some important information is adequately discussed but others poorly discussed, somewhat useful for patients.

(Score 4) Good quality and generally good flow, most of the relevant information is listed.but some topics not covered, useful for patients.

(Score 5) Excellent quality and excellent flow, very useful for patients.

1. **JAMA** (Journal of the American Medical Association benchmark criteria)

The score of each question ranges from 0 to 1. The total score is 0 to 4.

1. Authorship: Clearly states authors/creators (individuals or organizations) with relevant credentials.
2. Attribution: Sources of information are listed (e.g., peer-reviewed studies, clinical guidelines).
3. Currency: Provides dates of creation/update to ensure timeliness.
4. Transparency: Discloses conflicts of interest (e.g., sponsorships, funding sources).
