# Supplementary material
Source: Research Square preprint supplement (doi:10.21203/rs.3.rs-8997024/v1)
Supplement: Supplementary file 3 [file 970c7778621a514ad9adec8b.docx]

Table1*:Stepwise regression analysis predicting Global Quality Scores of rhinitis on TikTok and BiliBili.

| Model | Predictors included | *R2* | Adjusted *R2* | SE of the estimate | *F* Change | *P* value | ANOVA | |
| --- | --- | --- | --- | --- | --- | --- | --- | --- |
| *F* | *P* |
| 1 | GQS ~ JAMA + Likes | 0.681 | 0.678 | 0.617 | 188.268 | < 0.001 | 188.268 | < 0.001 |
| 2 | GQS ~ JAMA + Likes + PEMAT-A + PEMAT-U + VIQI | 0.761 | 0.754 | 0.539 | 19.186 | < 0.001 | 110.163 | < 0.001 |
| 3 | GQS ~ JAMA + PEMAT-A + PEMAT-U + VIQI | 0.760 | 0.754 | 0.539 | 1.046 | 0.308 | 137.405 | < 0.001 |
| 4 | GQS ~ JAMA + VIQI | 0.757 | 0.754 | 0.539 | 0.835 | 0.436 | 274.492 | < 0.001 |

Table2*:Stepwise regression coefficients, statistical significance, and collinearity assessment for the prediction of Global Quality Scores of rhinitis

| Model and predictors | Unstandardized Coefficient | | Standardized Coefficient | *t* | *P* value | Collinearity statistics | |
| --- | --- | --- | --- | --- | --- | --- | --- |
| B (95% CI) | SE | Tolerance | Vif |
| 1 |  |  |  |  |  |  |  |
| Constant | 0.887 (0.671, 1.104) | 0.111 | - | 8.024 | 0.000 | - | - |
| JAMA | 0.932 (0.836, 1.027) | 0.049 | 0.818 | 19.079 | 0.000 | 0.985 | 1.015 |
| Likes | 0.000 (-0.000, 0.000) | 0.000 | 0.051 | 1.199 | 0.232 | 0.985 | 1.015 |
| 2 |  |  |  |  |  |  |  |
| Constant | -0.078 (-0.529, 0.374) | 0.230 | - | -0.336 | 0.737 | - | - |
| JAMA | 0.457 (0.304, 0.609) | 0.078 | 0.401 | 5.877 | 0.000 | 0.297 | 3.370 |
| Likes | 0.000 (-0.000, 0.000) | 0.000 | 0.041 | 1.023 | 0.308 | 0.876 | 1.142 |
| PEMAT-A | -0.003 (-0.010, 0.003) | 0.003 | -0.068 | -1.035 | 0.302 | 0.319 | 3.137 |
| PEMAT-U | 0.009 (-0.003, 0.021) | 0.006 | 0.124 | 1.476 | 0.142 | 0.196 | 5.115 |
| VIQI | 0.118 (0.074, 0.163) | 0.023 | 0.447 | 5.186 | 0.000 | 0.186 | 5.388 |
| 3 |  |  |  |  |  |  |  |
| Constant | -0.025 (-0.465, 0.416) | 0.225 | - | -0.110 | 0.913 | - | - |
| JAMA | 0.460 (0.307, 0.612) | 0.078 | 0.403 | 5.914 | 0.000 | 0.297 | 3.367 |
| PEMAT-A | -0.003 (-0.009, 0.003) | 0.003 | -0.056 | -0.864 | 0.389 | 0.330 | 3.034 |
| PEMAT-U | 0.007 (-0.004, 0.018) | 0.006 | 0.097 | 1.217 | 0.225 | 0.217 | 4.616 |
| VIQI | 0.123 (0.079, 0.167) | 0.022 | 0.466 | 5.511 | 0.000 | 0.194 | 5.163 |
| 4 |  |  |  |  |  |  |  |
| Constant | 0.190 (-0.073, 0.453) | 0.134 | - | 1.412 | 0.160 | - | - |
| JAMA | 0.473 (0.326, 0.619) | 0.075 | 0.415 | 6.308 | 0.000 | 0.319 | 3.136 |
| VIQI | 0.131 (0.097, 0.165) | 0.017 | 0.496 | 7.538 | 0.000 | 0.319 | 3.136 |

Table3*:Stepwise regression analysis predicting modified DISCERN of rhinitis on TikTok and BiliBili.

| Model | Predictors included | *R2* | Adjusted *R2* | SE of the estimate | *F* Change | *P* value | ANOVA | |
| --- | --- | --- | --- | --- | --- | --- | --- | --- |
| *F* | *P* |
| 1 | mDISCERN ~ VIQI + Fans | 0.739 | 0.733 | 0.483 | 122.888 | 0.000 | 122.888 | < 0.001 |
| 2 | mDISCERN ~ Fans + JAMA + Likes + PEMAT-A + PEMAT-U + Total views + VIQI | 0.794 | 0.777 | 0.441 | 4.455 | 0.001 | 45.265 | < 0.001 |
| 3 | mDISCERN ~ Fans + JAMA + PEMAT-A + PEMAT_U + VIQI | 0.790 | 0.777 | 0.441 | 0.961 | 0.387 | 63.046 | < 0.001 |
| 4 | mDISCERN ~ VIQI + JAMA + PEMAT-A + PEMAT-U | 0.788 | 0.778 | 0.440 | 0.669 | 0.416 | 78.948 | < 0.001 |

Table4*:Stepwise regression coefficients, statistical significance, and collinearity assessment for the prediction of modified DISCERN scores of

rhinitis

| Model and predictors | Unstandardized Coefficient | | Standardized Coefficient | *t* | *P* value | Collinearity statistics | |
| --- | --- | --- | --- | --- | --- | --- | --- |
| B (95% CI) | SE | Tolerance | Vif |
| 1 |  |  |  |  |  |  |  |
| Constant | 0.118 (-0.225, 0.462) | 0.175 | - | 0.675 | 0.501 | - | - |
| VIQI | 0.196 (0.170, 0.221) | 0.013 | 0.848 | 14.942 | 0.000 | 0.933 | 1.072 |
| Fans | 0.000 (-0.000, 0.000) | 0.000 | 0.040 | 0.709 | 0.480 | 0.933 | 1.072 |
| 2 |  |  |  |  |  |  |  |
| Constant | -0.322 (-0.906, 0.261) | 0.298 | - | -1.082 | 0.282 | - | - |
| Fans | 0.000 (-0.000, 0.000) | 0.000 | 0.147 | 1.412 | 0.162 | 0.232 | 4.315 |
| JAMA | 0.366 (0.161, 0.571) | 0.105 | 0.338 | 3.500 | 0.001 | 0.268 | 3.728 |
| Likes | -0.000 (-0.000, 0.000) | 0.000 | -0.235 | -1.378 | 0.172 | 0.086 | 11.599 |
| PEMAT_A | -0.008 (-0.017, 0.001) | 0.005 | -0.157 | -1.712 | 0.091 | 0.298 | 3.356 |
| PEMAT_U | 0.019 (0.003, 0.034) | 0.008 | 0.283 | 2.384 | 0.019 | 0.178 | 5.612 |
| Total_views | 0.000 (-0.000, 0.000) | 0.000 | 0.135 | 1.033 | 0.305 | 0.147 | 6.818 |
| VIQI | 0.099 (0.041, 0.158) | 0.030 | 0.431 | 3.345 | 0.001 | 0.151 | 6.626 |
| 3 |  |  |  |  |  |  |  |
| Constant | -0.257 (-0.832, 0.317) | 0.293 | - | -0.879 | 0.382 | - | - |
| Fans | 0.000 (-0.000, 0.000) | 0.000 | 0.043 | 0.818 | 0.416 | 0.904 | 1.106 |
| JAMA | 0.374 (0.174, 0.574) | 0.102 | 0.346 | 3.669 | 0.000 | 0.282 | 3.547 |
| PEMAT_A | -0.007 (-0.016, 0.002) | 0.004 | -0.147 | -1.619 | 0.109 | 0.305 | 3.278 |
| PEMAT_U | 0.016 (0.001, 0.031) | 0.008 | 0.242 | 2.108 | 0.038 | 0.190 | 5.259 |
| VIQI | 0.106 (0.049, 0.164) | 0.029 | 0.461 | 3.632 | 0.000 | 0.155 | 6.435 |
| 4 |  |  |  |  |  |  |  |
| Constant | -0.287 (-0.856, 0.282) | 0.290 | - | -0.989 | 0.326 | - | - |
| VIQI | 0.107 (0.049, 0.164) | 0.029 | 0.462 | 3.648 | 0.000 | 0.155 | 6.434 |
| JAMA | 0.373 (0.174, 0.573) | 0.102 | 0.345 | 3.671 | 0.000 | 0.282 | 3.547 |
| PEMAT_A | -0.007 (-0.015, 0.002) | 0.004 | -0.135 | -1.508 | 0.135 | 0.313 | 3.190 |
| PEMAT_U | 0.016 (0.001, 0.031) | 0.008 | 0.243 | 2.119 | 0.037 | 0.190 | 5.258 |
