# Supplementary material
Source: Research Square preprint supplement (doi:10.21203/rs.3.rs-8997024/v1)
Supplement: Supplementary file 4 [file b73ccdb7760007e625fdd60a.docx]

**Supplementary File 1: Detailed Protocol for Data Collection of Rhinitis-Related Short Videos on Social Media Platforms**

**1. Platform-Specific Data Collection Procedures**

**1.1 Target Platforms**
This study focuses specifically on **Douyin (TikTok)** and **BiliBili**, representing the two dominant short- and mid-length video platforms, respectively, where Chinese-speaking individuals with rhinitis are most actively engaged.

**1.2 Search Strategy**
The core search term used was **“rhinitis”** (Chinese: 鼻炎). For each platform, the default “comprehensive ranking” algorithm was applied, and the top **100 relevant videos** were collected to minimize selection bias introduced by manual filtering.

**1.3 Data Collection Tools**
Authorized data collection tools with access to official platform APIs—namely **Douba (Douyin-focused)** and **Octoparse**—were employed. These tools simultaneously recorded video metadata, engagement metrics, and uploader information. To ensure sample randomness, personalized recommendation algorithms were disabled during data extraction.

**1.4 Uploader Classification**
Uploader characteristics were assessed based on professional verification status:

**Verification Status**: Whether the uploader held official medical-related credentials verified by Douyin or Bilibili (e.g., licensed physician certification, institutional healthcare accreditation).

**Uploader Type**: (1)Professional uploaders: Individuals or entities with verified medical credentials (e.g., certified physicians, accredited healthcare institutions). (2)Non-professional uploaders: Those without medical verification, including health influencers, general users, independent content creators, and non-medical organizations.

**2. Definition and Extraction Criteria for Engagement Metrics**

**2.1 Core Engagement Indicators**

- **Likes**: Cumulative number of user-initiated “like” actions.
- **Comments**: Total count of valid user comments posted under the video (excluding platform-filtered or moderated comments).
- **Saves/Favorites**: Number of times the video was added to users’ personal collections.
- **Shares**: Total instances of in-app sharing or cross-platform forwarding.
- **Views/Plays**: Official platform-reported play count, including both partial and complete views.

**2.2 Data Extraction Timepoint**
All engagement metrics were extracted at **24:00 on the final day of the data collection period** to ensure metric stability and mitigate the impact of short-term fluctuations.

**3. Content Coding Framework**

**3.1 Thematic Category Coding**

- **Disease Awareness**: Etiology, symptom recognition, rhinitis subtypes (e.g., allergic vs. non-allergic), and pathophysiological mechanisms.
- **Treatment Options**: Pharmacological therapies (e.g., oral medications, nasal sprays), surgical interventions, traditional Chinese medicine, and home remedies.
- **Daily Care**: Nasal irrigation, environmental control, dietary adjustments, and exercise-related precautions.
- **Patient Experience**: Personal narratives regarding illness trajectory, treatment outcomes, and healthcare experiences.
- **Myth-Busting**: Correction of common misconceptions (e.g., “rhinitis can be cured permanently,” “antibiotics treat rhinitis”).

**3.2 Presentation Style Coding**

- **Monologue Explanation**: A single presenter delivers information directly to the camera without additional scenes or interaction.
- **Case-Based Sharing**: Content centered around specific patient cases, integrating clinical insights or experiential analysis.
- **Animated Infographics**: Educational animations (2D/3D or motion graphics) illustrating rhinitis-related concepts.
- **Q&A Format**: Interactive dialogues, such as physician–patient interviews or expert panel discussions.
- **TV Program Clips**: Original or repurposed segments from televised health education shows or news reports.

**3.3 Decision-Making Context Coding**

- **Symptom Self-Assessment**: Guides viewers in identifying whether they may have rhinitis and determining its subtype.
- **Treatment Selection**: Provides reference information to support choices among therapeutic options.
- **Myth-Busting**: Clarifies prevalent misunderstandings to promote evidence-based understanding.
- **Daily Care Guidance**: Demonstrates practical self-management techniques (e.g., saline nasal rinsing).
- **Special Populations**: Tailored advice for vulnerable groups such as children, elderly individuals, or pregnant women.
