# Supplementary material
Source: Research Square preprint supplement (doi:10.21203/rs.3.rs-8997024/v1)
Supplement: Supplementary file 5 [file d87dd482ce98401445640a9c.docx]

Survey Questionnaire: The Influence of Short-Form Social Media Videos on Medical Decision-Making Among Patients with Rhinitis

Dear Participant,

Thank you for your time and willingness to participate in this study. This survey aims to understand how short-form videos on social media platforms influence medical decision-making among individuals with rhinitis. Your responses will be used solely for academic research purposes, kept strictly confidential, and reported only in aggregate form. There are no right or wrong answers—please answer based on your personal experience and honest opinions.

We sincerely appreciate your support!

Section I: Demographic Information

1. Gender:

☐ Male

☐ Female

2. Age:

☐ 18–25 years

☐ 26–35 years

☐ 36–45 years

☐ 46–55 years

☐ 56 years or older

3. Highest Educational Attainment:

☐ Junior high school or below

☐ High school / vocational secondary school

☐ Associate degree (e.g., junior college)

☐ Bachelor’s degree or higher

4. Occupation:

☐ Student

☐ Corporate employee

☐ Public sector / civil servant

☐ Freelancer / self-employed

☐ Retired

☐ Other: _______________

Section II: Rhinitis-Related Information

1. Duration of rhinitis diagnosis:

☐ Less than 1 year

☐ 1–3 years

☐ 4–6 years

☐ 7–10 years

☐ More than 10 years

2. Pattern of rhinitis symptoms:

☐ Seasonal (symptoms occur only during specific seasons)

☐ Perennial (symptoms persist year-round or recur frequently)

3. Type(s) of rhinitis (select all that apply):

☐ Allergic rhinitis

☐ Chronic rhinitis

☐ Rhinosinusitis (sinusitis)

☐ Other: _______________

4. Current treatment approach(es) (select all that apply):

☐ Pharmacotherapy (e.g., oral medications, nasal sprays)

☐ Physical therapy (e.g., nasal irrigation, warm compresses)

☐ Surgical treatment

☐ No formal medical treatment

☐ Traditional Chinese medicine

☐ Other: _______________

Section III: Social Media Usage

1. Which social media platforms do you use regularly? (select all that apply)

☐ Douyin (TikTok)

☐ Bilibili

☐ WeChat Channels (Video Accounts)

☐ Xiaohongshu (Little Red Book)

☐ Other: _______________

2. On average, how much time do you spend daily on these platforms?

☐ Less than 1 hour

☐ 1–3 hours

☐ 3–5 hours

☐ More than 5 hours

3. Have you ever watched short videos related to rhinitis on social media?

☐ Yes → Please continue to the next question

☐ No → Skip to the end of the questionnaire

4. How often do you watch rhinitis-related short videos?

☐ Almost daily

☐ 3–5 times per week

☐ 1–2 times per week

☐ 1–2 times per month

☐ Occasionally (less than once per month)

5. What types of rhinitis-related content do you usually watch? (select all that apply)

☐ Symptom differentiation (e.g., distinguishing rhinitis from common cold)

☐ Etiology and prevention (e.g., allergen avoidance)

☐ Treatment options (e.g., medications, surgery, home remedies)

☐ Daily self-care (e.g., nasal rinsing techniques)

☐ Patient experience sharing

☐ Other: _______________

6. How credible do you find the rhinitis-related videos you watch?

☐ Very credible

☐ Somewhat credible

☐ Neutral

☐ Slightly not credible

☐ Not at all credible

7. How well do you understand the content of these videos?

☐ Fully understandable

☐ Mostly understandable

☐ Partially understandable

☐ Hardly understandable

☐ Not understandable at all

8. How practical or actionable do you find the recommendations in these videos?

☐ Very practical (I can directly apply the advice)

☐ Moderately practical (some parts are applicable)

☐ Neutral

☐ Slightly impractical

☐ Completely impractical

Section IV: Impact on Medical Decision-Making

1. Has watching rhinitis-related short videos ever led you to change your healthcare behavior?

☐ Yes → Please continue to the next question

☐ No → Skip to the end of the questionnaire

2. What specific changes did you make? (select all that apply)

☐ Decided to seek medical care or switched hospitals/doctors

☐ Adjusted medication use (e.g., changed drugs, altered dosage)

☐ Tried physical therapy or self-care methods recommended in videos

☐ Tried home remedies or alternative treatments suggested in videos

☐ Declined a treatment previously recommended by a physician

☐ Other: _______________

3. What type of content creator most influenced your decision?

☐ Verified physicians (with official platform certification)

☐ Healthcare institutions (e.g., hospitals, medical associations)

☐ General health influencers (no professional credentials)

☐ Fellow patients sharing personal experiences

☐ Unclear about the uploader’s background

4. Which type of video content had the greatest impact on your decision?

☐ Professional explanations by physicians

☐ References to clinical studies or clinical guidelines

☐ Real patient case stories

☐ Visual demonstrations of symptoms or treatments

☐ Other: _______________

Thank you very much for completing this survey! Your participation is invaluable to our research.
