# Supplementary material
Source: Research Square preprint supplement (doi:10.21203/rs.3.rs-8997024/v1)

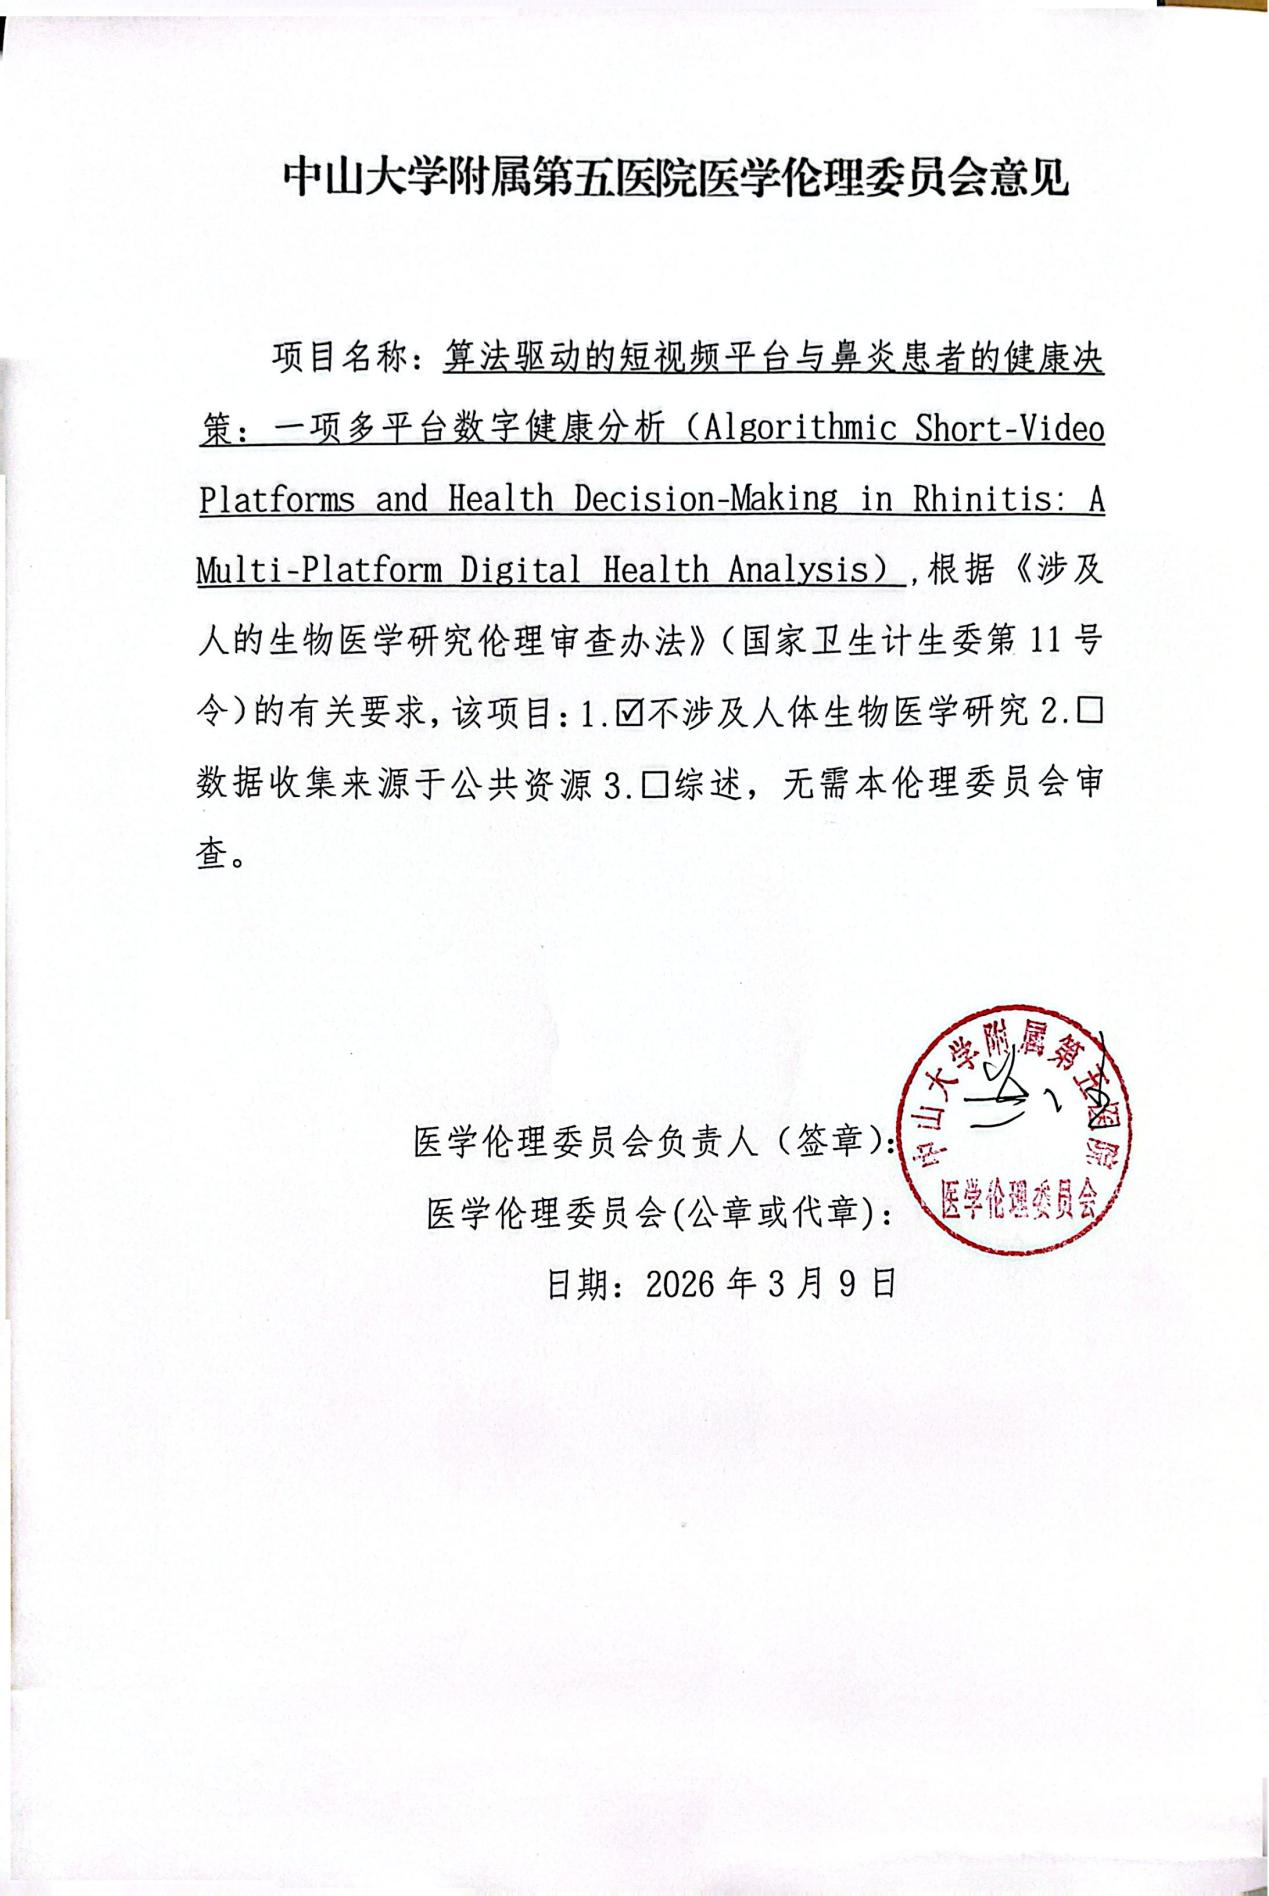


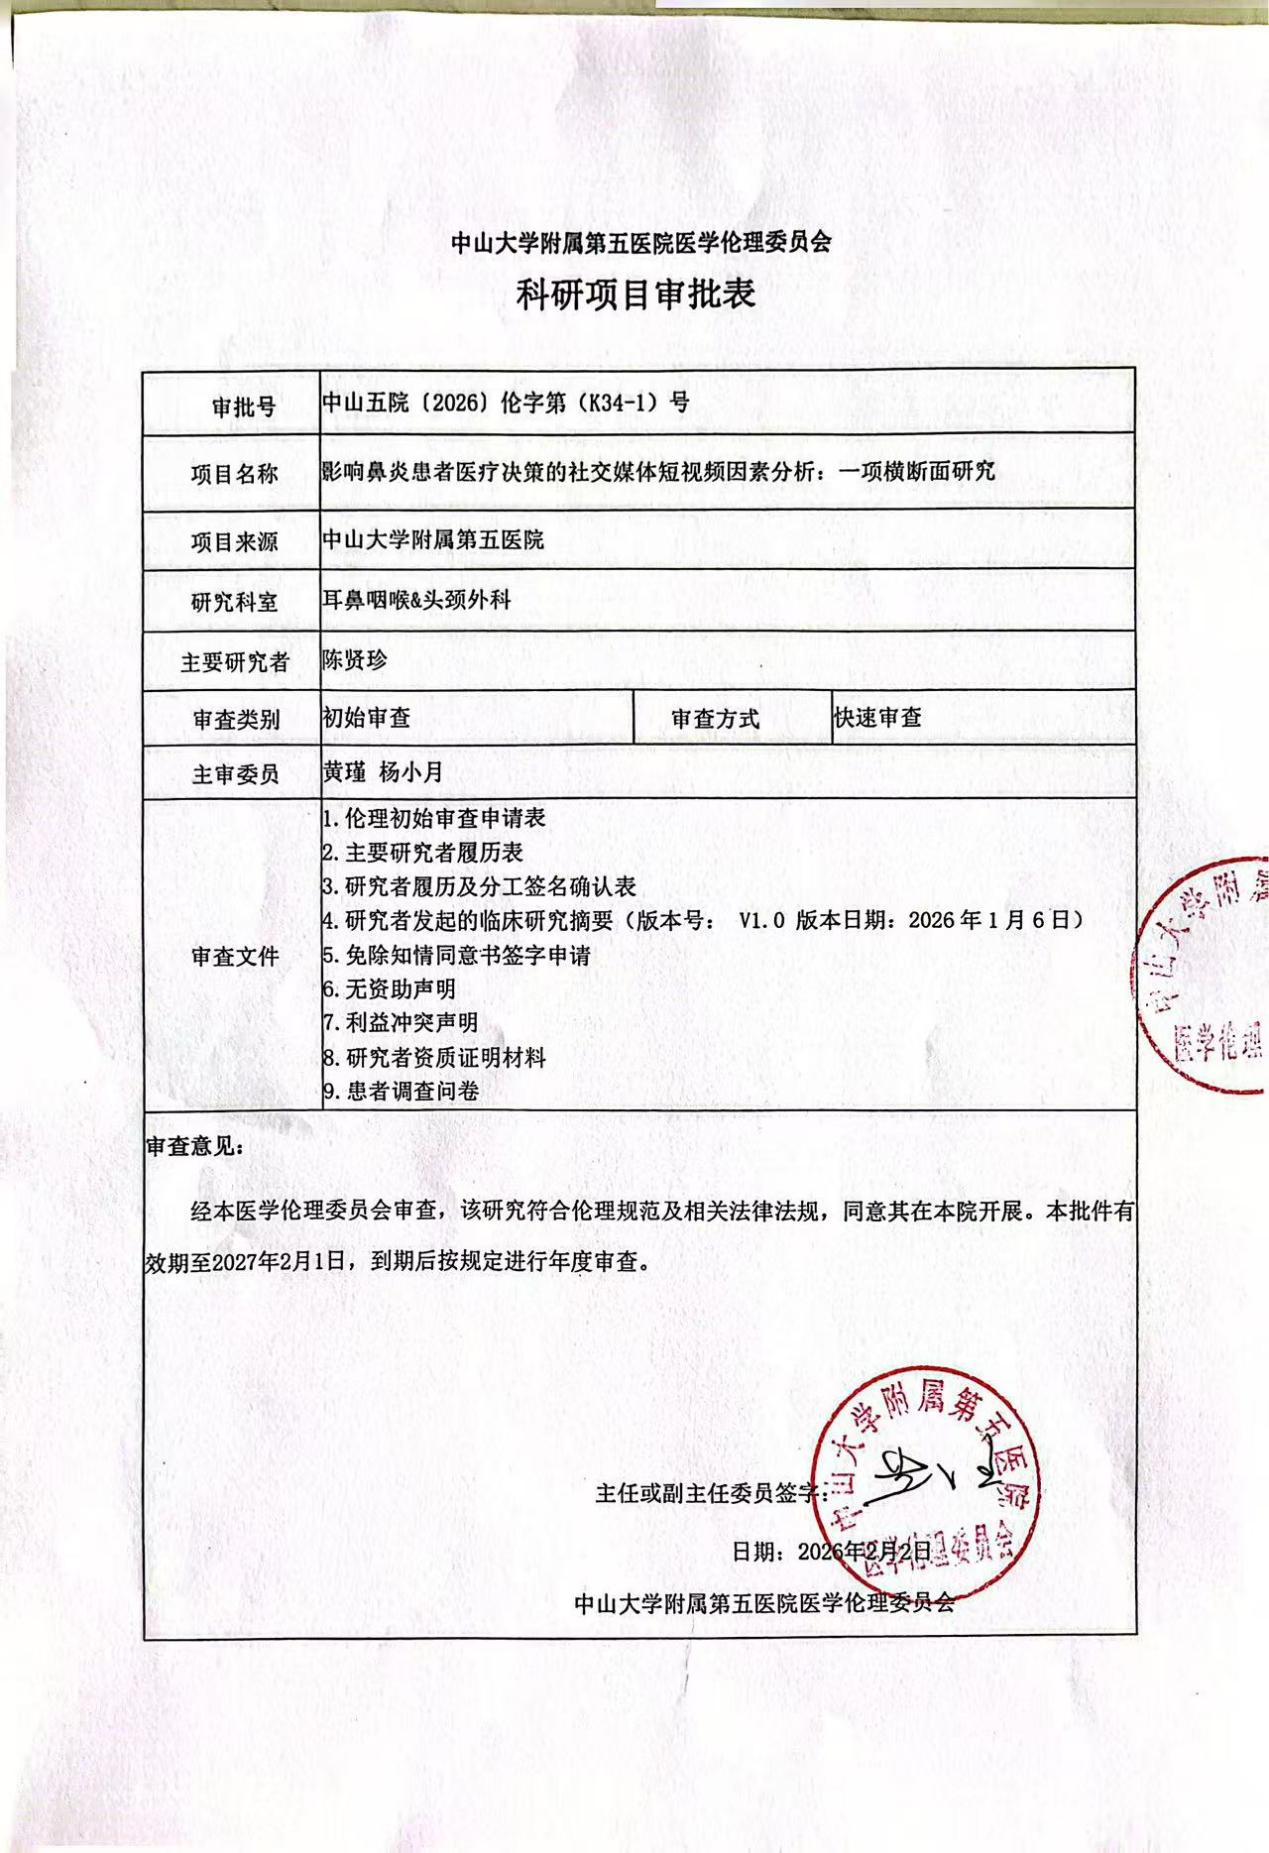

Supplement: Supplementary file 2 [file 62bf7d8e63912c387e6f2357.docx]
